# Supplementary material for: Screen printed passive components for flexible power electronics
Source: PubMed Central journal article supplement (PMC4626765; doi:10.1038/srep15959), 2015-10-30
Supplement: srep15959-s1.pdf [file srep15959-s1.pdf]

## Supplementary Information

### Screen printed passive components for flexible power electronics

Aminy E. Ostfeld, Igal Deckman, Abhinav M. Gaikwad, Claire M. Lochner, and Ana C. Arias

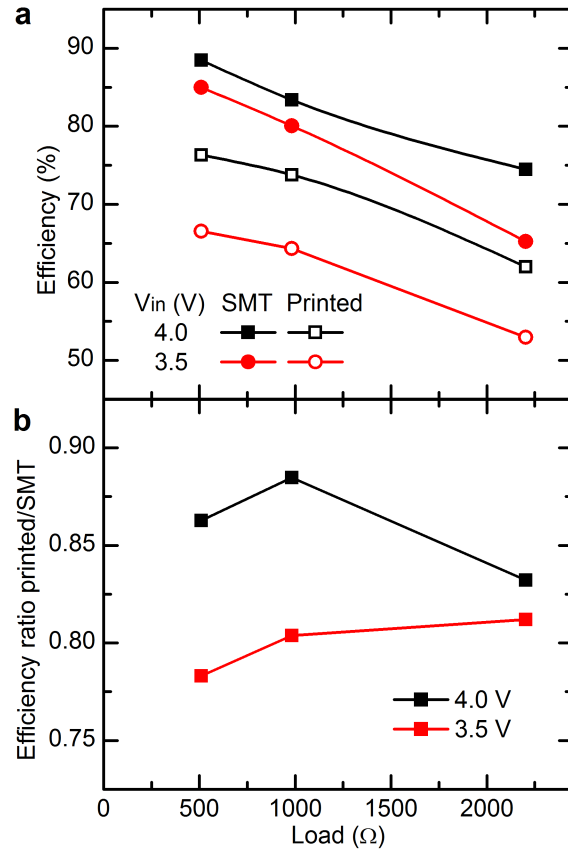

Figure S1. (a) Efficiency of a voltage regulator circuit on flex-PCB using all surface-mount (SMT) components vs. one with printed inductor and resistors, for various load resistances and input voltages. (b) Ratio of efficiencies of the surface-mount and printed circuits shown in (a).
